# Supplementary material for: Ex vivo-expanded human CD19+TIM-1+ regulatory B cells suppress immune responses in vivo and are dependent upon the TIM-1/STAT3 axis
Source: PubMed Central journal article supplement (PMC9166804; doi:10.1038/s41467-022-30613-z), 2022-06-03
Supplement: 41467_2022_30613_MOESM1_ESM.pdf [file 41467_2022_30613_MOESM1_ESM.pdf]

# Supplementary Information

**Ex vivo-expanded human CD19<sup>+</sup>TIM-1<sup>+</sup> regulatory B cells suppress immune responses *in vivo* and are dependent upon the TIM-1/STAT3 axis**

**\*Shankar S<sup>1,2</sup>, Stolp J<sup>1</sup>, Juvet SC<sup>1</sup>, Beckett J<sup>1</sup>, Macklin PS<sup>3</sup>, Issa F<sup>1</sup>, Hester J<sup>1</sup>, \*Wood KJ<sup>1</sup>**

## **Affiliations**

- 1 Transplantation Research and Immunology Group, Nuffield Department of Surgical Sciences, University of Oxford, Oxford UK
- 2 Oxford Transplant Centre, Nuffield Department of Surgical Sciences, University of Oxford, Oxford UK
- 3 Nuffield Department of Medicine Research Building, Nuffield Department of Medicine, University of Oxford, Oxford, United Kingdom

\*Correspondence to: Sushma Shankar [sushma.shankar@nds.ox.ac.uk](mailto:sushma.shankar@nds.ox.ac.uk) and Kathryn J Wood [kathryn.wood@nds.ox.ac.uk](mailto:kathryn.wood@nds.ox.ac.uk)

## **Table of Contents**

|                                      |           |
|--------------------------------------|-----------|
| <i>Supplementary Figure 1</i> .....  | <b>3</b>  |
| <i>Supplementary Figure 2</i> .....  | <b>5</b>  |
| <i>Supplementary Figure 3</i> .....  | <b>7</b>  |
| <i>Supplementary Figure 4</i> .....  | <b>9</b>  |
| <i>Supplementary Figure 5</i> .....  | <b>11</b> |
| <i>Supplementary Figure 6</i> .....  | <b>13</b> |
| <i>Supplementary Figure 7</i> .....  | <b>15</b> |
| <i>Supplementary Figure 8</i> .....  | <b>17</b> |
| <i>Supplementary Figure 9</i> .....  | <b>19</b> |
| <i>Supplementary Figure 10</i> ..... | <b>21</b> |
| <i>Supplementary Table 1</i> .....   | <b>23</b> |

# Supplementary Figure 1

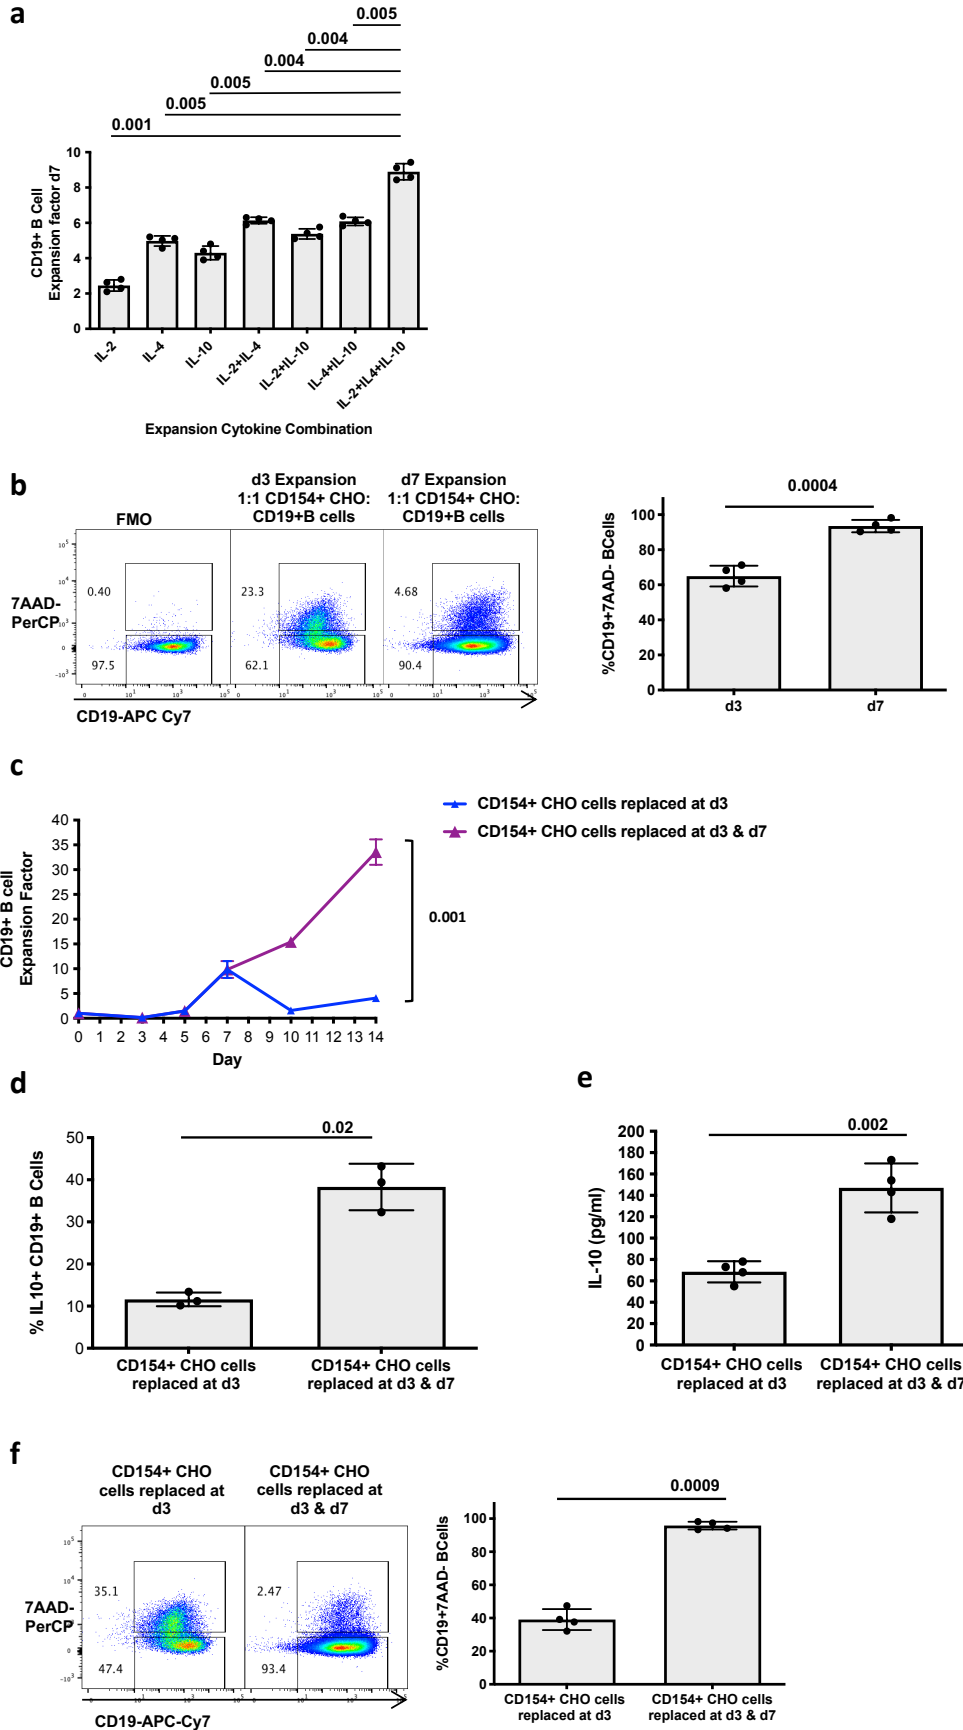

## Supplementary Figure 1

**a)** Summarised data of expansion factor of expBreg when expanded at a 1:1 CD154<sup>+</sup> CHO cell-CD19<sup>+</sup> B cell ratio with different cytokine combinations are presented. Data from experiments performed with cells from different healthy donors ( $n = 4$ ) are presented. Each dot is an individual response. **(b)** Representative FACS plots and summarised data of % CD19<sup>+</sup>7AAD<sup>+</sup> B cells at day-3 and day-7 of B cell expansion are shown. Data from experiments performed with cells from different healthy donors ( $n = 4$ ) are presented. Each dot is an individual response. **(c)** Human CD19<sup>+</sup> B cell expansion could be maintained in culture for at least 14 days when CD154<sup>+</sup> CHO cells were replaced at day-3 and day-7 within the *ex vivo* culture system. Data from experiments performed with cells from different healthy donors ( $n = 3$ ) are presented. **(d)** Summarised data of % CD19<sup>+</sup>IL-10<sup>+</sup> B cells at day-14 of B cell expansion are shown, when CD154<sup>+</sup> CHO cells were replaced either at day-3 only, or at day-3 and day-7 within the *ex vivo* culture system. Data from experiments performed with cells from different healthy donors ( $n = 3$ ) are presented. Each dot is an individual response. **(e)** Summarised data of IL-10 production by human CD19<sup>+</sup> B cells at day-14 of B cell expansion are shown, when CD154<sup>+</sup> CHO cells were replaced either at day-3 only, or at day-3 and day-7 within the *ex vivo* culture system. Data from experiments performed with cells from different healthy donors ( $n = 4$ ) are presented. Each dot is an individual response. **(f)** Representative FACS plots and summarised data of % CD19<sup>+</sup>7AAD<sup>+</sup> B cells at day-14 of B cell expansion are shown, when CD154<sup>+</sup> CHO cells were replaced either at day-3 only, or at day-3 and day-7 within the *ex vivo* culture system. Data from experiments performed with cells from different healthy donors ( $n = 4$ ) are presented. Each dot is an individual response. Error bars in each panel represent Mean  $\pm$  SD (**a, b, d, e, f**). One-way ANOVA with Tukey's multiple comparisons test (**a**) and 2-tailed paired t-test (**b, c, d, e, f**) were used. Source data are provided as a Source Data file.

# Supplementary Figure 2

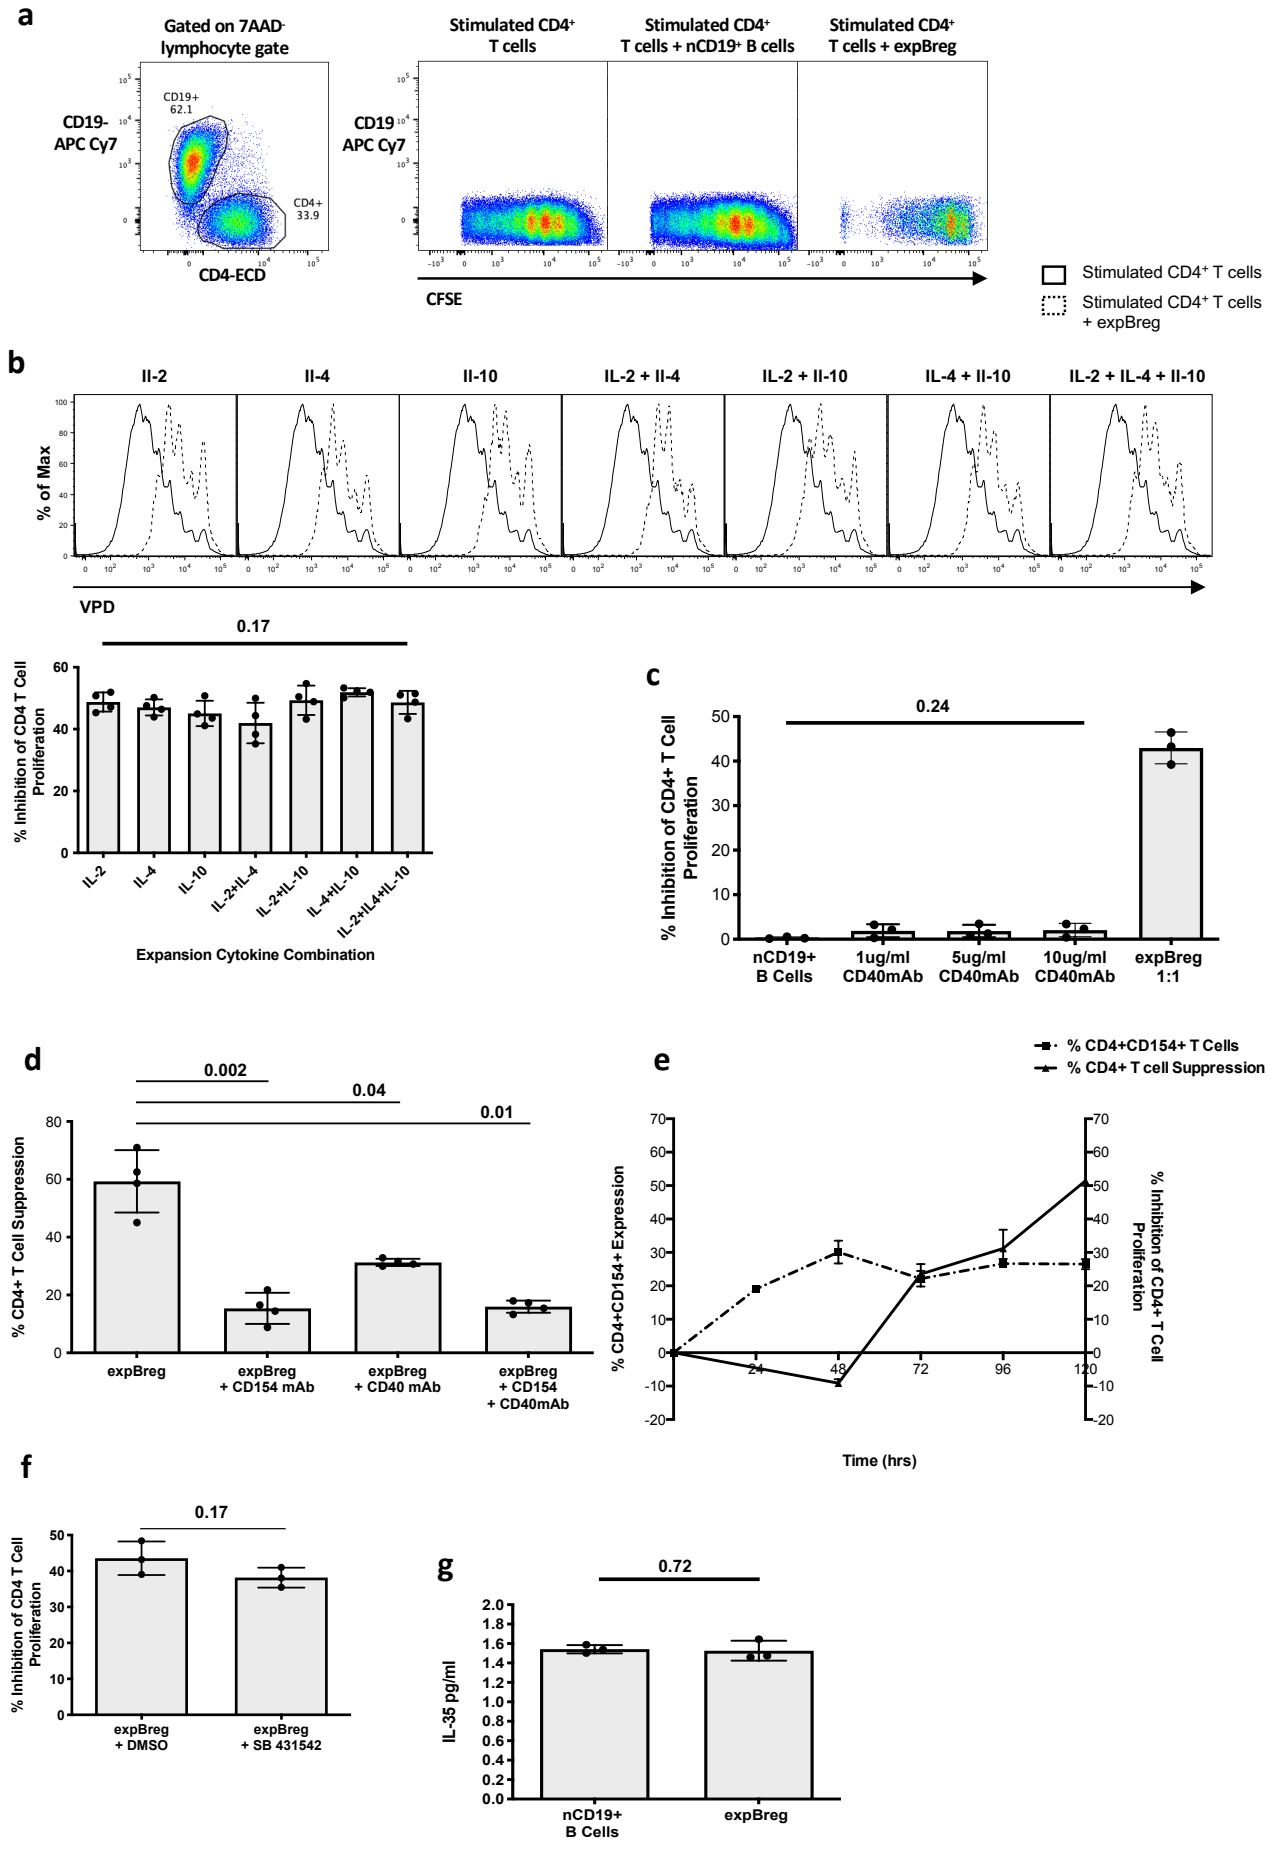

## Supplementary Figure 2

(a) Gating strategy & representative FACS plots of live CD4<sup>+</sup>CFSE<sup>+</sup> T cells when autologous CD4<sup>+</sup>CFSE<sup>+</sup> T cells were cultured with anti-CD3/CD28 beads for 5 days +/- non-expanded CD19<sup>+</sup> B cells or expBreg at 1:1 ratio of B:T cells. Live/dead exclusion was performed using 7-AAD. (b) Representative histograms of live CD4<sup>+</sup>VPD<sup>+</sup> T cells and summarised data of suppressive potency of expBreg when expanded at a 1:1 CD154<sup>+</sup> CHO cell-CD19<sup>+</sup> B cell ratio with different cytokine combinations, are presented. Autologous CD4<sup>+</sup>VPD<sup>+</sup> T cells were cultured with anti-CD3/CD28 beads for 5 days +/- expBreg. % Inhibition of CD4<sup>+</sup> T cell proliferation is an expression of Division Index of live CD4<sup>+</sup>CFSE<sup>+</sup> T cells at day 5 relative to that of the Stimulated CD4<sup>+</sup> T cell control. Data from experiments performed with cells from different healthy donors ( $n = 4$ ) are presented. Each dot is an individual response. (c) Summarised data of % inhibition of CD4<sup>+</sup> T cell proliferation are presented, when autologous CD4<sup>+</sup>VPD<sup>+</sup> T cells were cultured with anti-CD3/CD28 beads for 5 days +/-non-expanded CD19<sup>+</sup> B cells (nCD19<sup>+</sup> B cells), expBreg or CD19<sup>+</sup> B cells that had been stimulated with plate-bound agonistic CD40 mAb (at [1ug/ml], [5ug/ml] or [10ug/ml] concentrations) for 7 days. Data from experiments performed with cells from different healthy donors ( $n = 3$ ) are presented. Each dot is an individual response. (d) Summarised data of % inhibition of CD4<sup>+</sup> T cell proliferation by expBreg when in the presence of blocking CD154 mAb, blocking CD40 mAb, or both. Blocking mAbs were added at day-0 of the 5-day suppression assay. Data from experiments performed with cells from different healthy donors ( $n = 4$ ) are presented. Each dot is an individual response. (e) Summarised data of % Inhibition of CD4<sup>+</sup> T cell proliferation by expBreg and expression of CD154 on CD4<sup>+</sup> T cells when measured daily in the 5-day suppression assay. Data from experiments performed with cells from different healthy donors ( $n = 4$ ) are presented. Each dot is an individual response. (f) Summarised data of % inhibition of CD4<sup>+</sup> T cell proliferation by expBreg when in the presence of TGF $\beta$  inhibitor SB 431542 [ $\mu$ M/L] or DMSO. SB 431542 or DMSO were added at day-0 of the 5-day suppression assay. Data from experiments performed with cells from different healthy donors ( $n = 3$ ) are presented. Each dot is an individual response. (g) Summarised data of IL-35 production by nCD19<sup>+</sup> B cells or expBreg. Data from experiments performed with cells from different healthy donors ( $n = 3$ ) are presented. Each dot is an individual response. Error bars in each panel represent Mean +/- SD (b, c, e, f, g). One-way ANOVA with Tukey's multiple comparisons test (b, c, d) and 2-tailed paired t-test (f, g) were used. Source data are provided as a Source Data file.

### Supplementary Figure 3

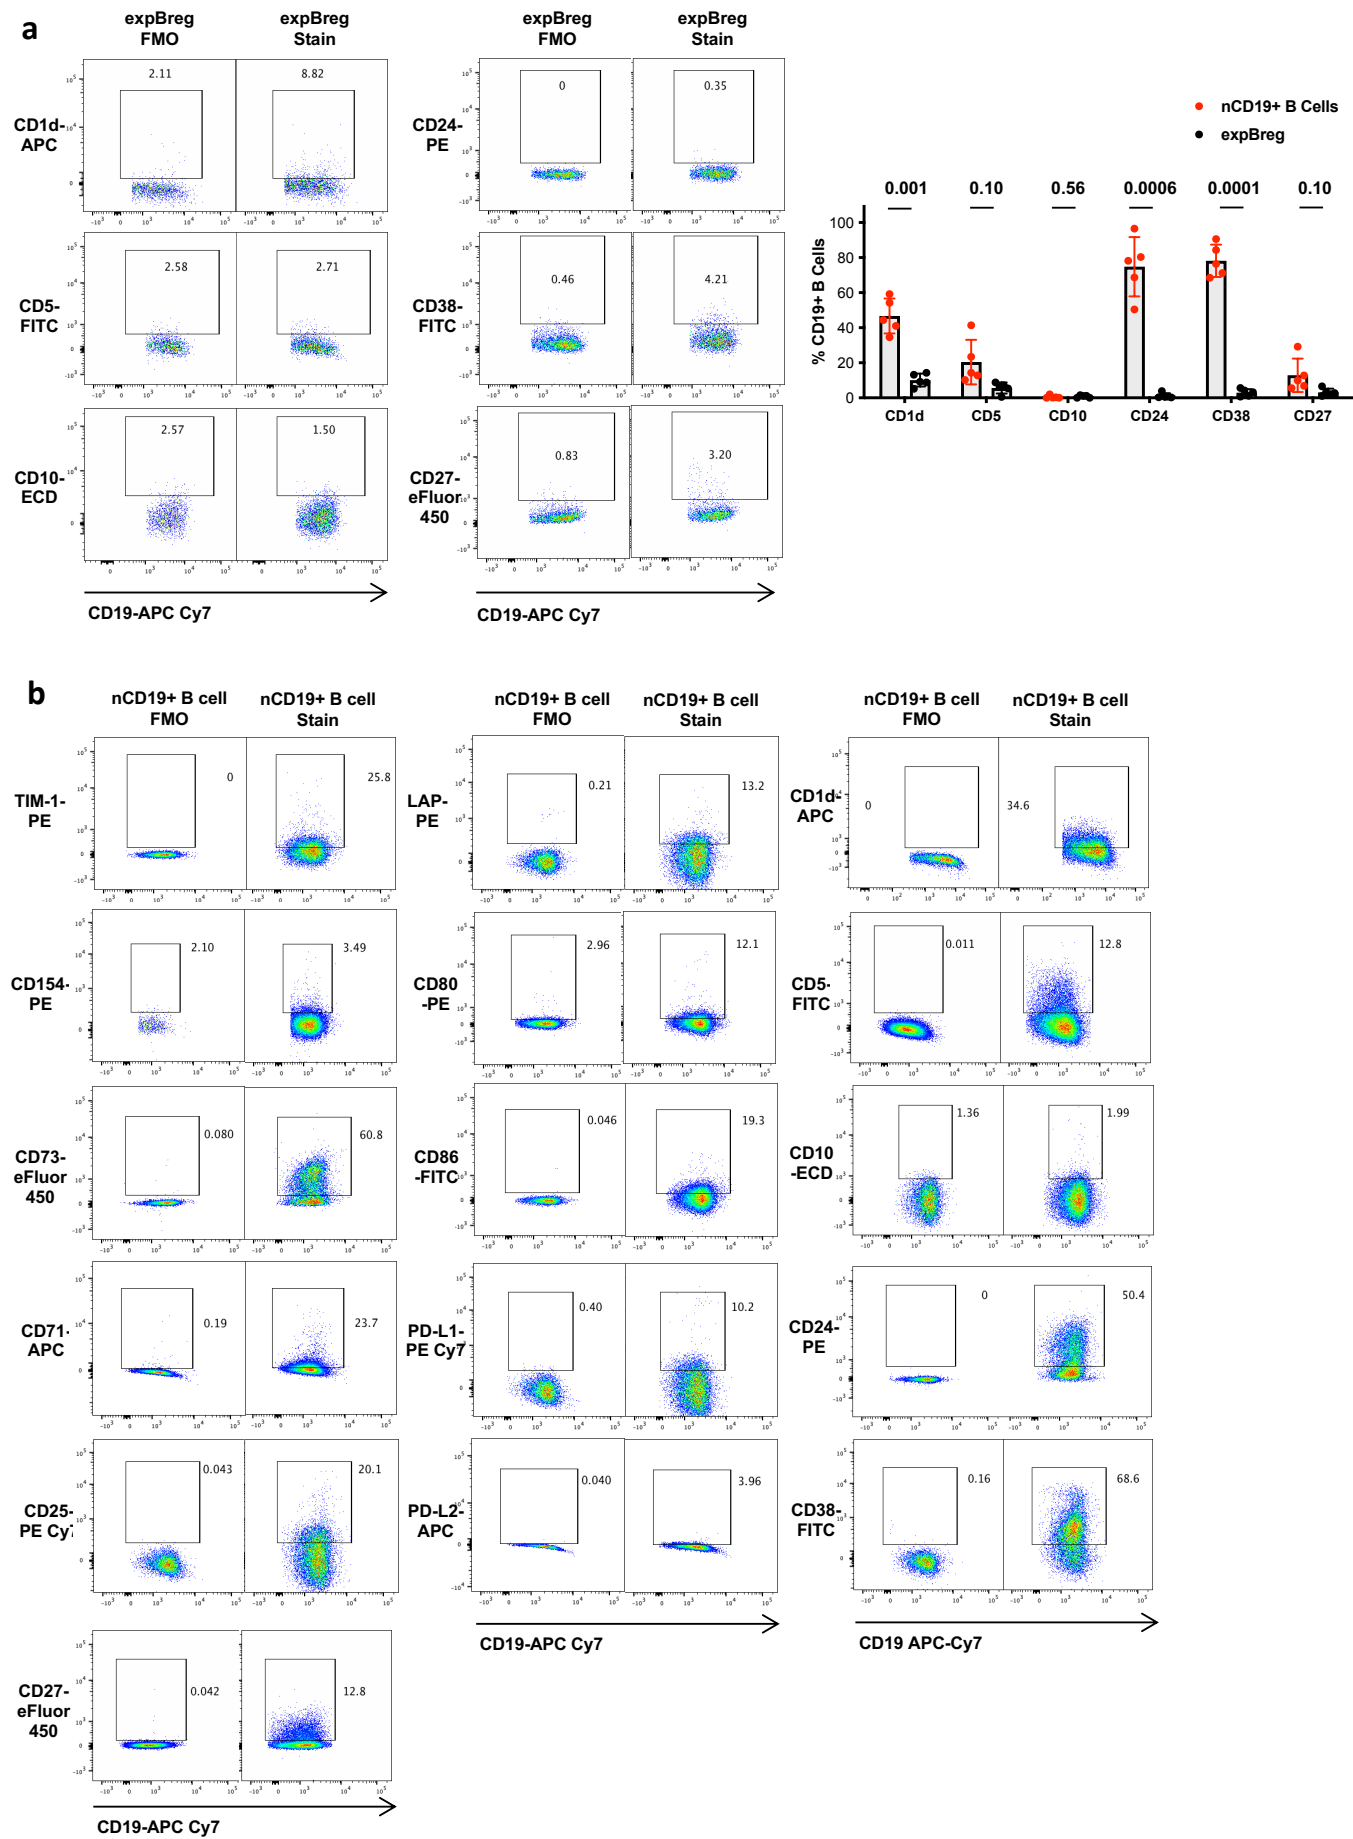

### Supplementary Figure 3

**(a)** Representative FACS plots of live CD19<sup>+</sup> B cells and summarised data demonstrating expression of cell surface markers by expBreg. Gating is on FMO controls. % Expression is compared between expBreg and autologous non-expanded CD19<sup>+</sup> B cells (nCD19<sup>+</sup> B cells). Data from experiments performed with cells from different healthy donors ( $n = 5$ ) are presented. Each dot is an individual response. **(b)** Representative FACS plots of live CD19<sup>+</sup> B cells demonstrating expression of cell surface markers by non-expanded CD19<sup>+</sup> B cells (nCD19<sup>+</sup> B cells). Gating is on FMO controls. Data from experiments performed with cells from different healthy donors ( $n = 5$ ) are presented. Each dot is an individual response. Error bars in **(a)** represent Mean  $\pm$  SD. 2-tailed paired t-tests **(a)** were used. Source data are provided as a Source Data file.



# Supplementary Figure 4

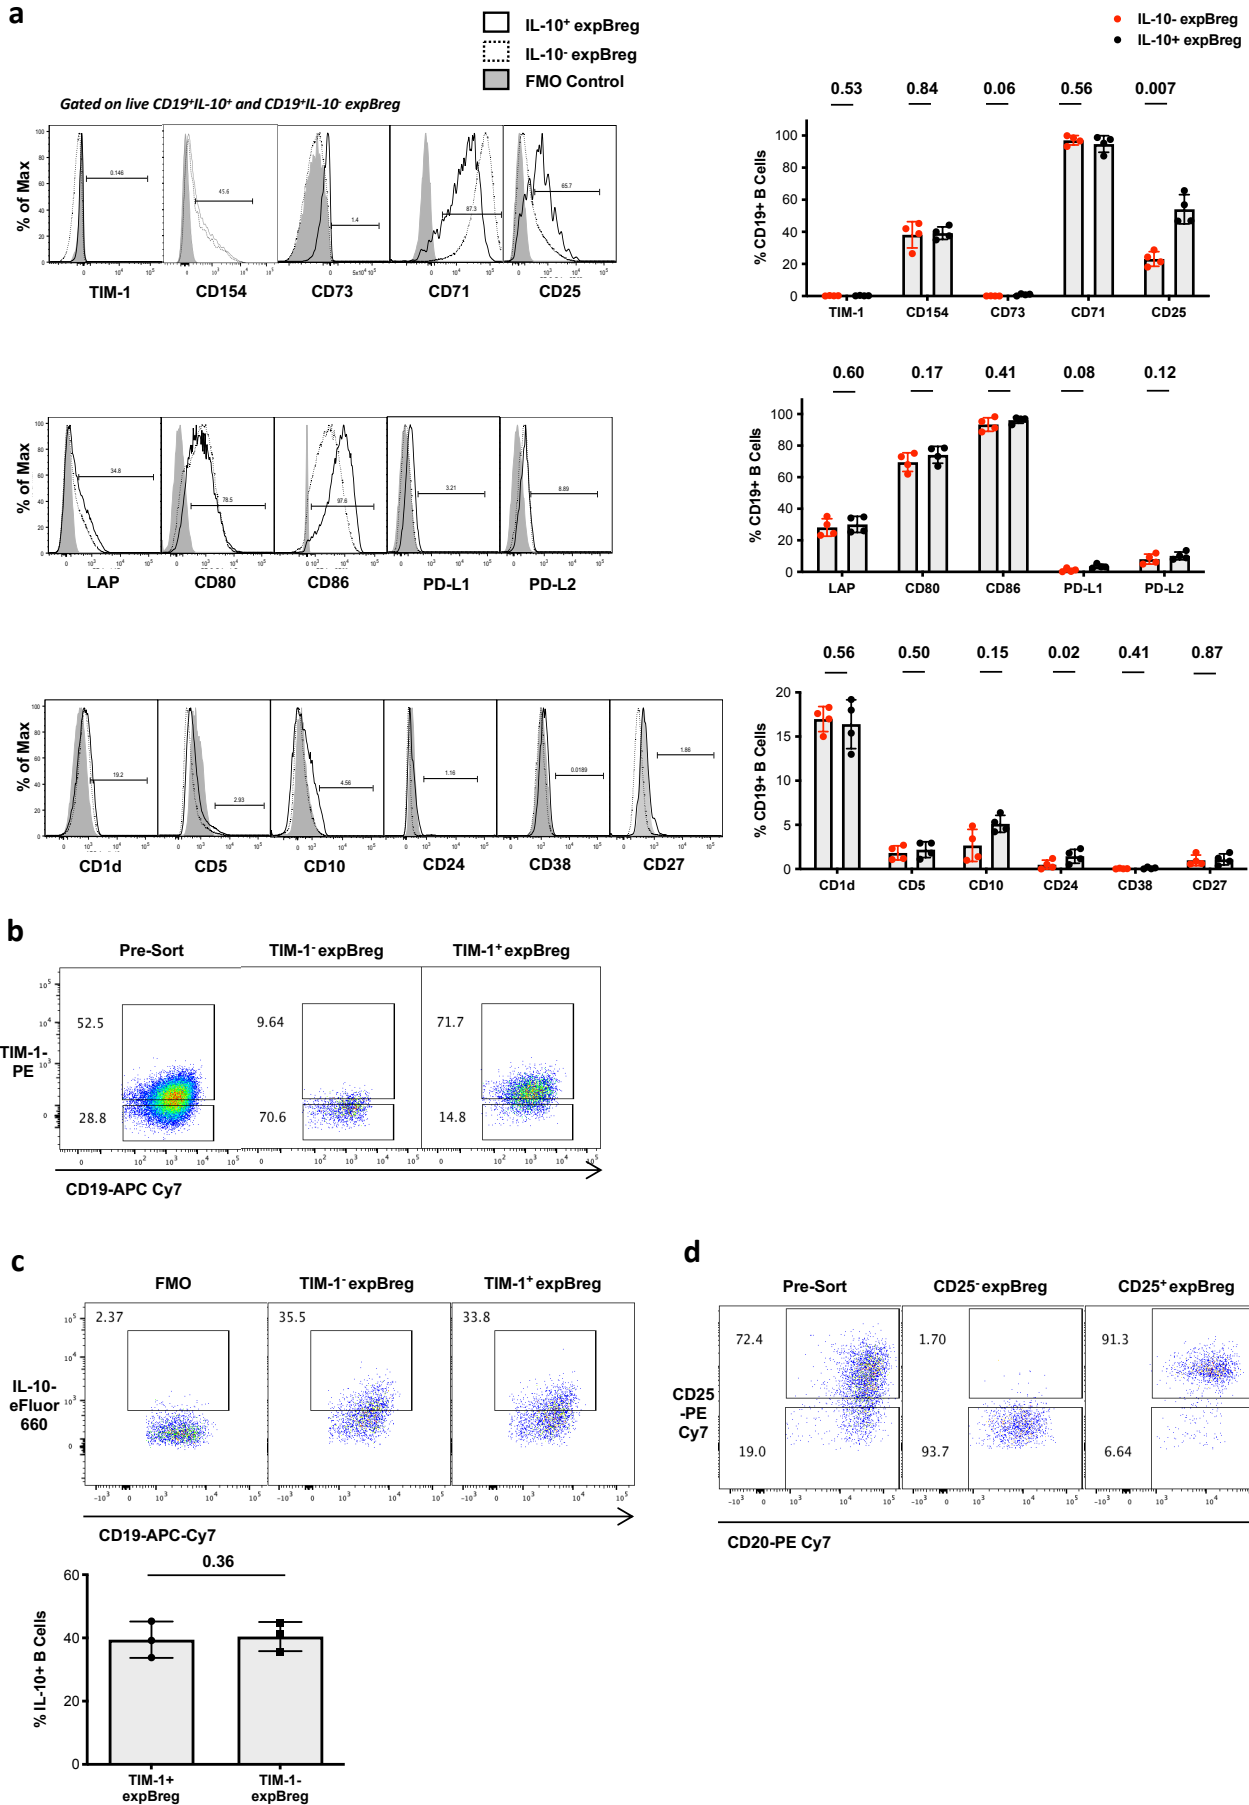

## Supplementary Figure 4

**(a)** Representative histograms and summarised data of cell surface markers expressed by IL-10<sup>+</sup> and IL-10<sup>-</sup> CD19<sup>+</sup> expBreg are presented. Gating is on FMO controls. Data from experiments performed with cells from different healthy donors ( $n = 4$ ) are presented. Each dot is an individual response. **(b)** FACS-sorting strategy to isolate expBreg based on the expression of TIM-1 **(c)** Representative FACS plots and summarised data of IL-10 expression by FACS-sorted TIM-1<sup>+</sup> and TIM-1<sup>-</sup> expBreg. Gating is on fluorescence minus one controls (FMO). **(d)** FACS-sorting strategy to isolate expBreg based on the expression of CD25. Error bars in **(a, c)** represent Mean  $\pm$  SD. 2-tailed paired t-tests **(a, c)** were used. Source data are provided as a Source Data file.

# Supplementary Figure 5

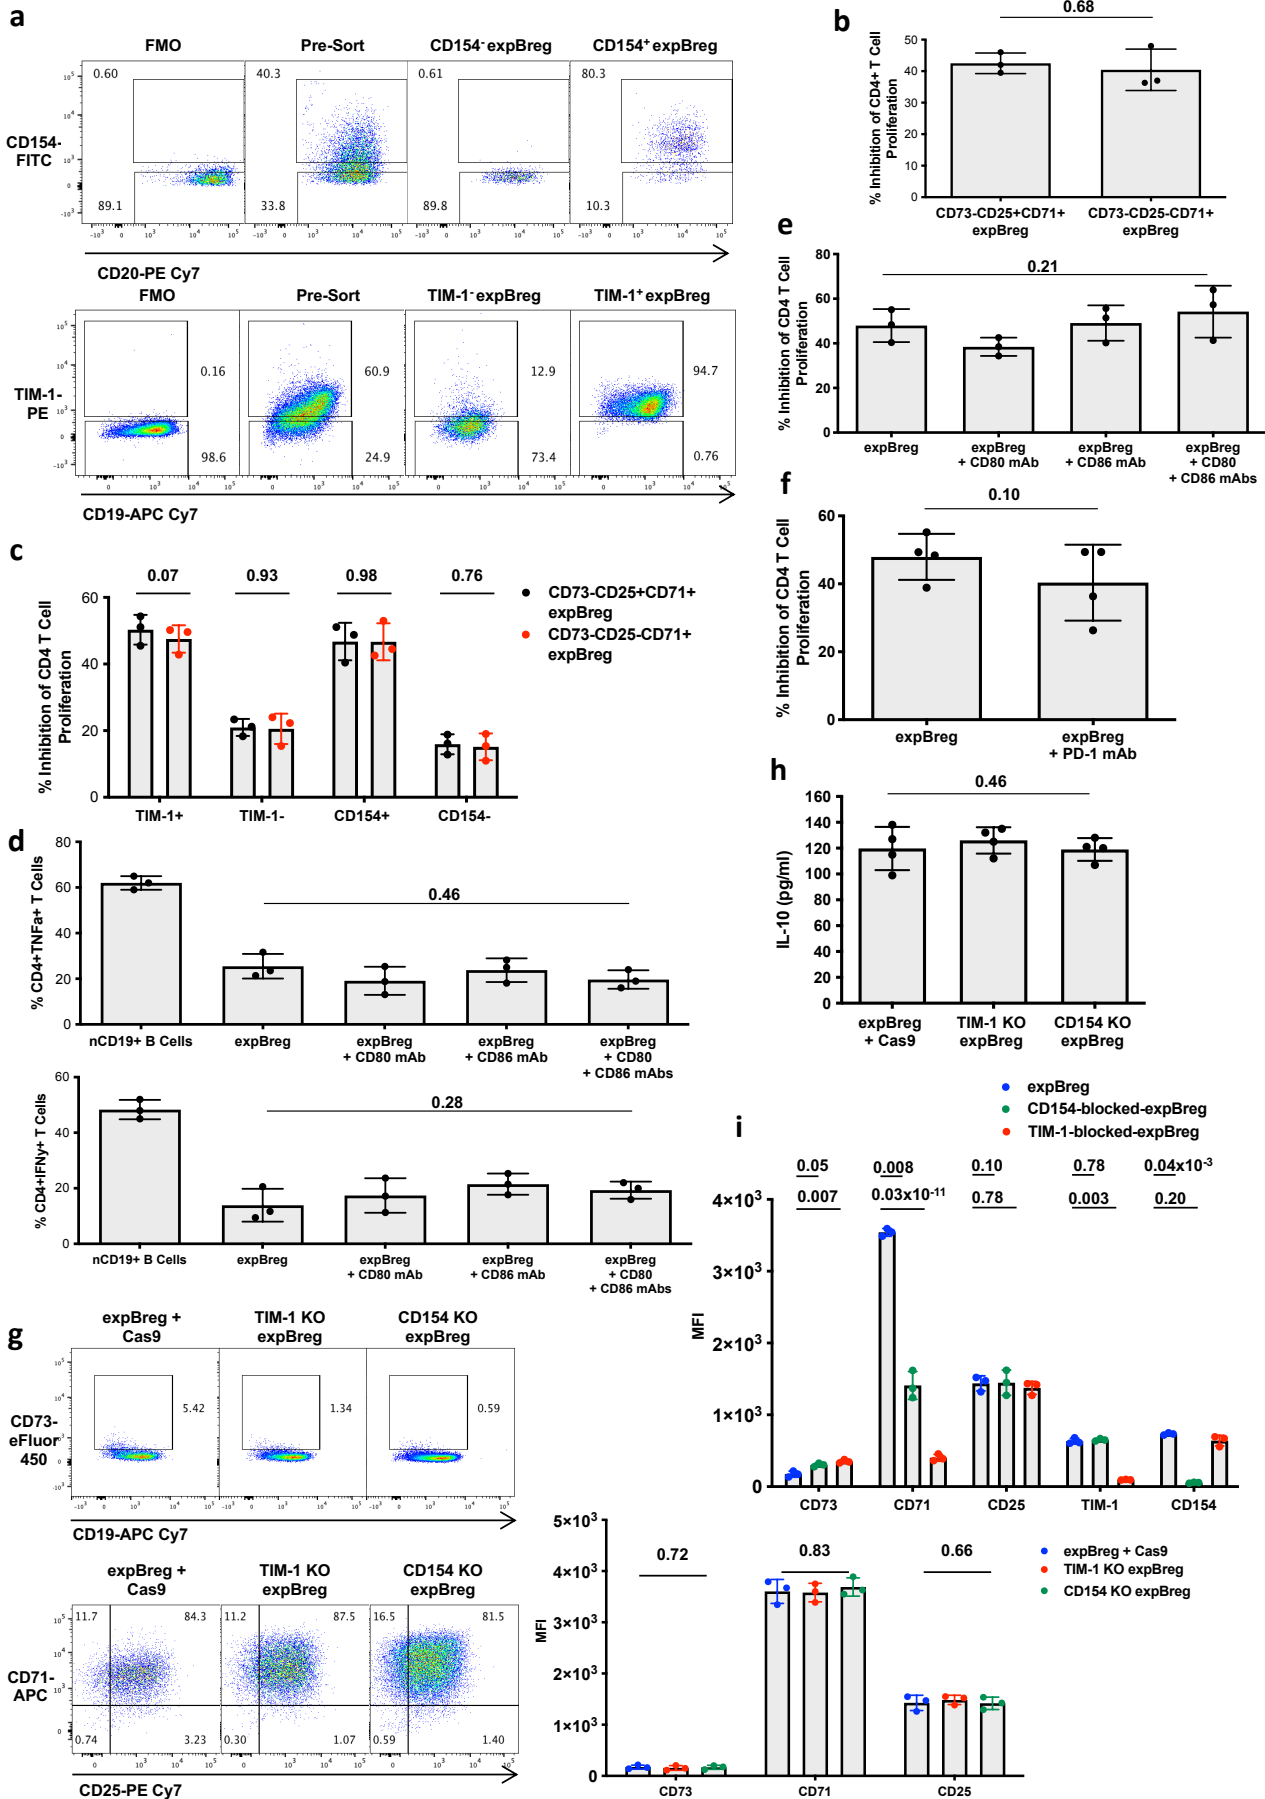

## Supplementary Figure 5

**(a)** FACS-sorting strategy to isolate expBreg based on the expression of CD154 or TIM-1. Gating is on fluorescence minus one controls (FMO). **(b)** Summarised data of % inhibition of CD4<sup>+</sup> T cell proliferation by FACS-sorted CD73<sup>-</sup>CD25<sup>+</sup>CD71<sup>+</sup> and CD73<sup>-</sup>CD25<sup>-</sup>CD71<sup>+</sup> expBreg are presented. Data from experiments performed with cells from different healthy donors ( $n = 3$ ) are presented. Each dot is an individual response. **(c)** Summarised data of % inhibition of CD4<sup>+</sup> T cell proliferation by FACS-sorted CD73<sup>-</sup>CD25<sup>+</sup>CD71<sup>+</sup> and CD73<sup>-</sup>CD25<sup>-</sup>CD71<sup>+</sup> expBreg which had been further FACS-sorted based on TIM-1 and CD154 expression, are presented. Data from experiments performed with cells from different healthy donors ( $n = 3$ ) are presented. Each dot is an individual response. **(d)** Summarised data of % CD4<sup>+</sup>TNFA<sup>+</sup> and CD4<sup>+</sup>IFN $\gamma$ <sup>+</sup> T cells at day-3 of suppression assay when autologous CD4<sup>+</sup> T cells were cultured with anti-CD3/CD28 beads +/- expBreg when in the presence of blocking CD80 mAb, blocking CD86 mAb, or both. Blocking mAbs was added at day-0 of suppression assay. Data from experiments performed with cells from different healthy donors ( $n = 3$ ) are presented. Each dot is an individual response. **(e)** Summarised data of % inhibition of CD4<sup>+</sup> T cell proliferation by expBreg when in the presence of blocking CD80 mAb, blocking CD86 mAb, or both. Blocking mAbs were added at day-0 of suppression assay. Data from experiments performed with cells from different healthy donors ( $n = 3$ ) are presented. Each dot is an individual response. **(f)** Summarised data of % inhibition of CD4<sup>+</sup> T cell proliferation by expBreg when in the presence of blocking PD-1 mAb. Blocking mAb was added at day-0 of suppression assay. Data from experiments performed with cells from different healthy donors ( $n = 4$ ) are presented. Each dot is an individual response. **(g)** Representative FACS plots of live CD19<sup>+</sup> expBreg and summarised data are presented which demonstrate protein expression of CD73, CD25 and CD71 after electroporation with Cas9 alone +/- TIM-1 or CD154 multiguide RNAs to generate TIM-1 or CD154 knockouts (KO). **(h)** Summarised data of IL-10 production by Cas9-expBreg, TIM-1 KO or CD154 KO expBreg are presented. Data from experiments performed with cells from different healthy donor ( $n = 4$ ) are presented. Each dot is an individual response. **(i)** Summarised data of mean fluorescence intensity (MFI) of cell surface markers expressed by expBreg which had been pre-incubated with IgG isotype control (Isotype-expBreg), anti-CD154 mAb (CD154-blocked-expBreg) or anti-TIM-1 mAb (TIM-1-blocked-expBreg) for the last 48 hours of expansion, are presented. Data from experiments performed with cells from different healthy donors ( $n = 3$ ) are presented. Each dot is an individual response. Error bars in **(b, c, d, e, f, g, h, i)** represent Mean +/- SD. One-way ANOVA with Tukey's multiple comparisons test **(d, e, g, h, i)** and 2-tailed paired t-test **(b, c, f)** were used. Source data are provided as a Source Data file.

# Supplementary Figure 6

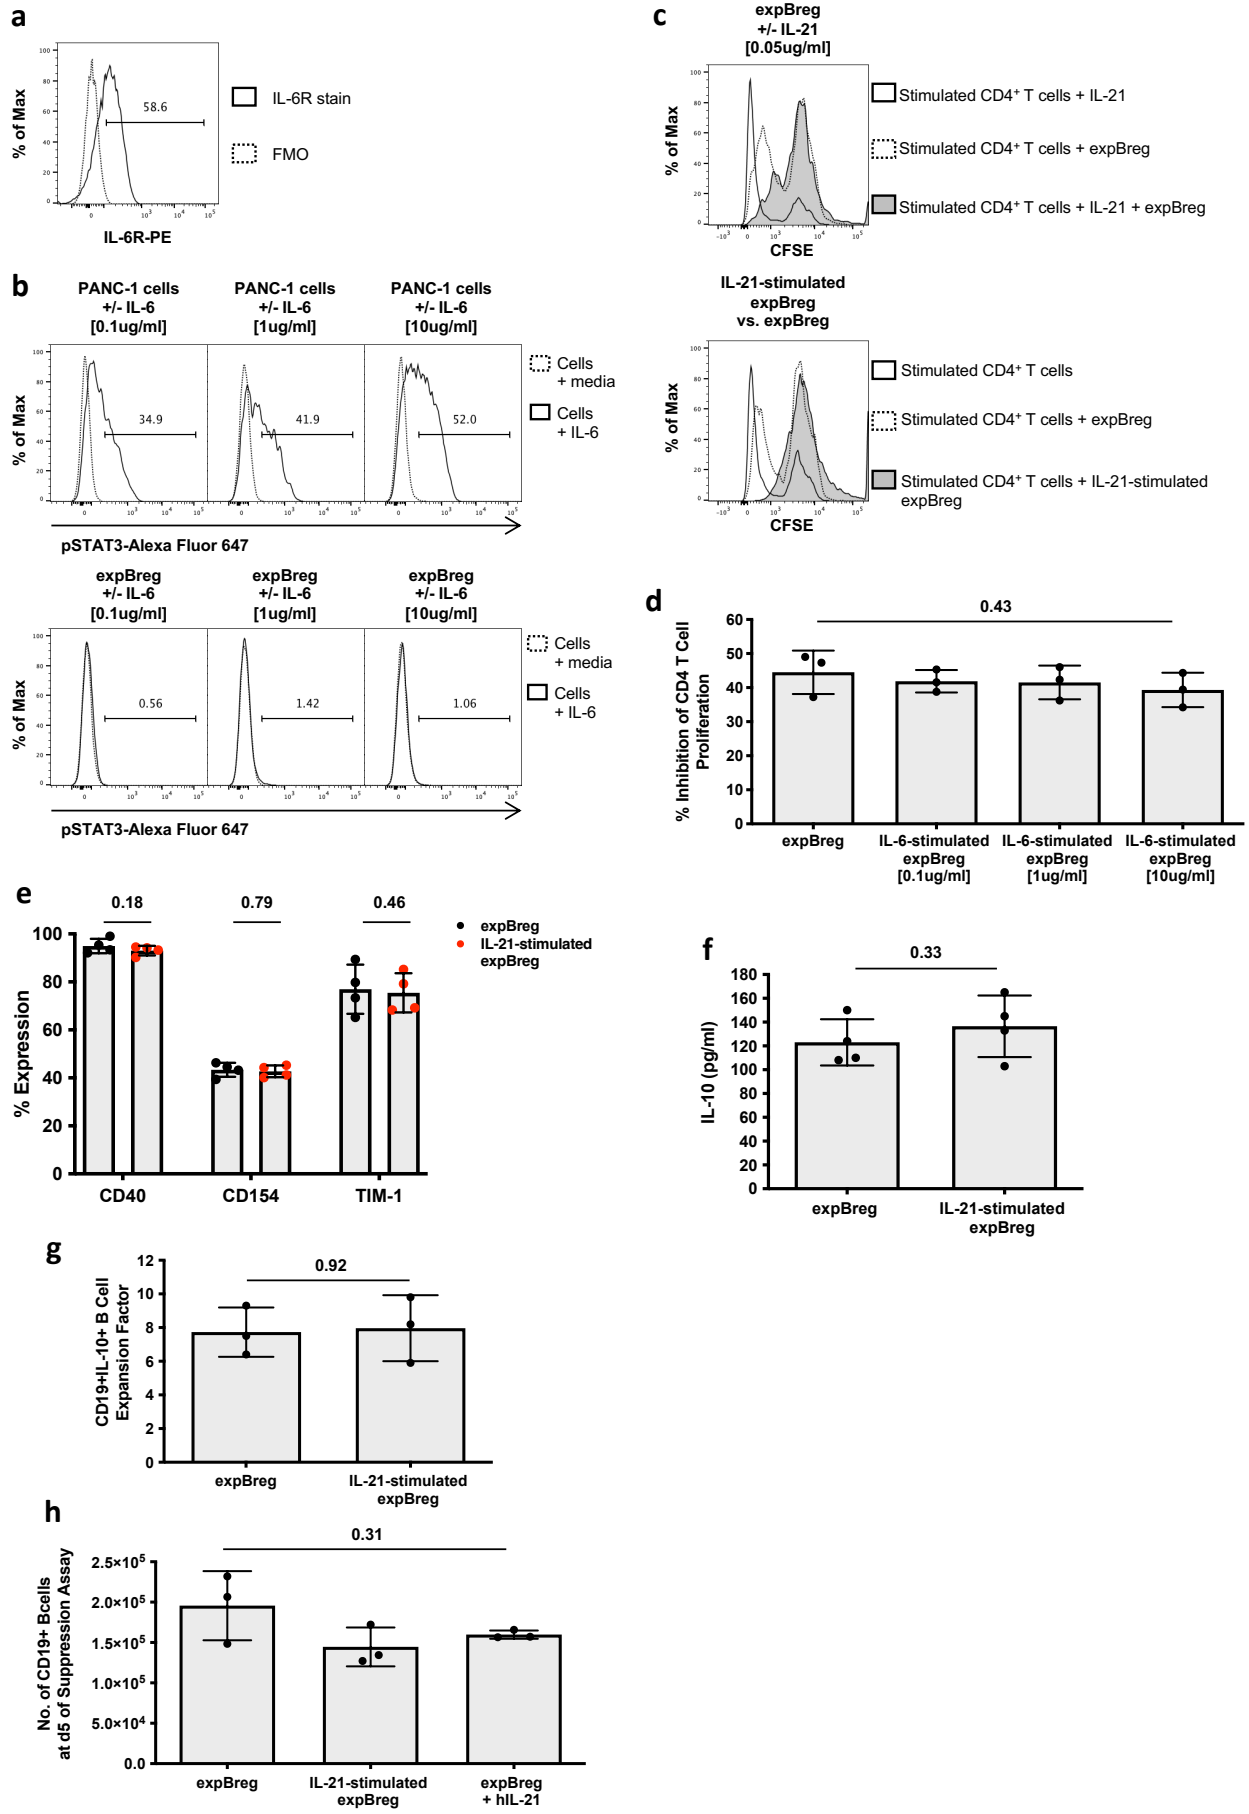

## Supplementary Figure 6

**(a)** Representative histograms of live CD19<sup>+</sup> expBreg are shown to demonstrate extracellular surface expression of IL-6 receptor (IL-6R). Gating is on fluorescence minus one controls (FMO). **(b)** Representative histograms of % STAT3 phosphorylation (pSTAT3) are presented when expBreg or an immortalised PANC-1 cell line were incubated with media or IL-6 ([0.01µg/ml], [1ug/ml] or [10ug/ml]) for 10 minutes and stained for pSTAT3. The PANC-1 cell line served as a positive control for IL-6-induced STAT3 phosphorylation. **(c)** Representative histograms of live CD4<sup>+</sup>CFSE<sup>+</sup> T cells are presented when autologous CD4<sup>+</sup>CFSE<sup>+</sup> T cells and anti-CD3/CD28 beads were co-cultured with expBreg +/- IL-21. expBreg were either pre-incubated with IL-21 [0.05µg/ml] for the last 48hrs of the 7-day expansion co-culture (IL-21-stimulated expBreg) prior to addition to the suppression assay at day-0, or IL-21 [0.05µg/ml] was directly added at day-0 of the suppression assay +/- expBreg (expBreg + hIL-21). **(d)** Summarised data of % inhibition of CD4<sup>+</sup> T cell proliferation are presented when autologous CD4<sup>+</sup>VPD<sup>+</sup> T cells and anti-CD3/CD28 beads were co-cultured alone or with expBreg. expBreg had been pre-incubated with IL-6 ([0.01µg/ml], [1ug/ml] or [10ug/ml]) for the last 48hrs of the 7-day expansion co-culture (IL-6-stimulated expBreg). Data from experiments performed with cells from different healthy donors (*n* = 3) are presented. Each dot is an individual response. **(e)** Summarised data are presented which demonstrate % expression of CD40, CD154 and TIM-1 by expBreg and IL-21-stimulated expBreg. Data from experiments performed with cells from different healthy donors (*n* = 4) are presented. Each dot is an individual response. **(f)** Summarised data of IL-10 production by expBreg and IL-21-stimulated expBreg. Data from experiments performed with cells from different healthy donors (*n* = 4) are presented. Each dot is an individual response. **(g)** Summarised data of expansion factor of expBreg +/- IL-21 for the last 48hrs of the 7-day expansion co-culture. Data from experiments performed with cells from different healthy donors (*n* = 3) are presented. Each dot is an individual response. **(h)** Summarised data of number of CD19<sup>+</sup> B cells at day-5 of suppression assay when expBreg, IL-21-stimulated expBreg or expBreg + IL-21 had been added at day-0 of suppression assay. Data from experiments performed with cells from different healthy donors (*n* = 3) are presented. Error bars in **(d, e, f, g, h)** represent Mean +/- SD. One-way ANOVA with Tukey's multiple comparisons test **(d, h)** and 2-tailed paired t-test **(e, f, g)** were used. Source data are provided as a Source Data file.

# Supplementary Figure 7

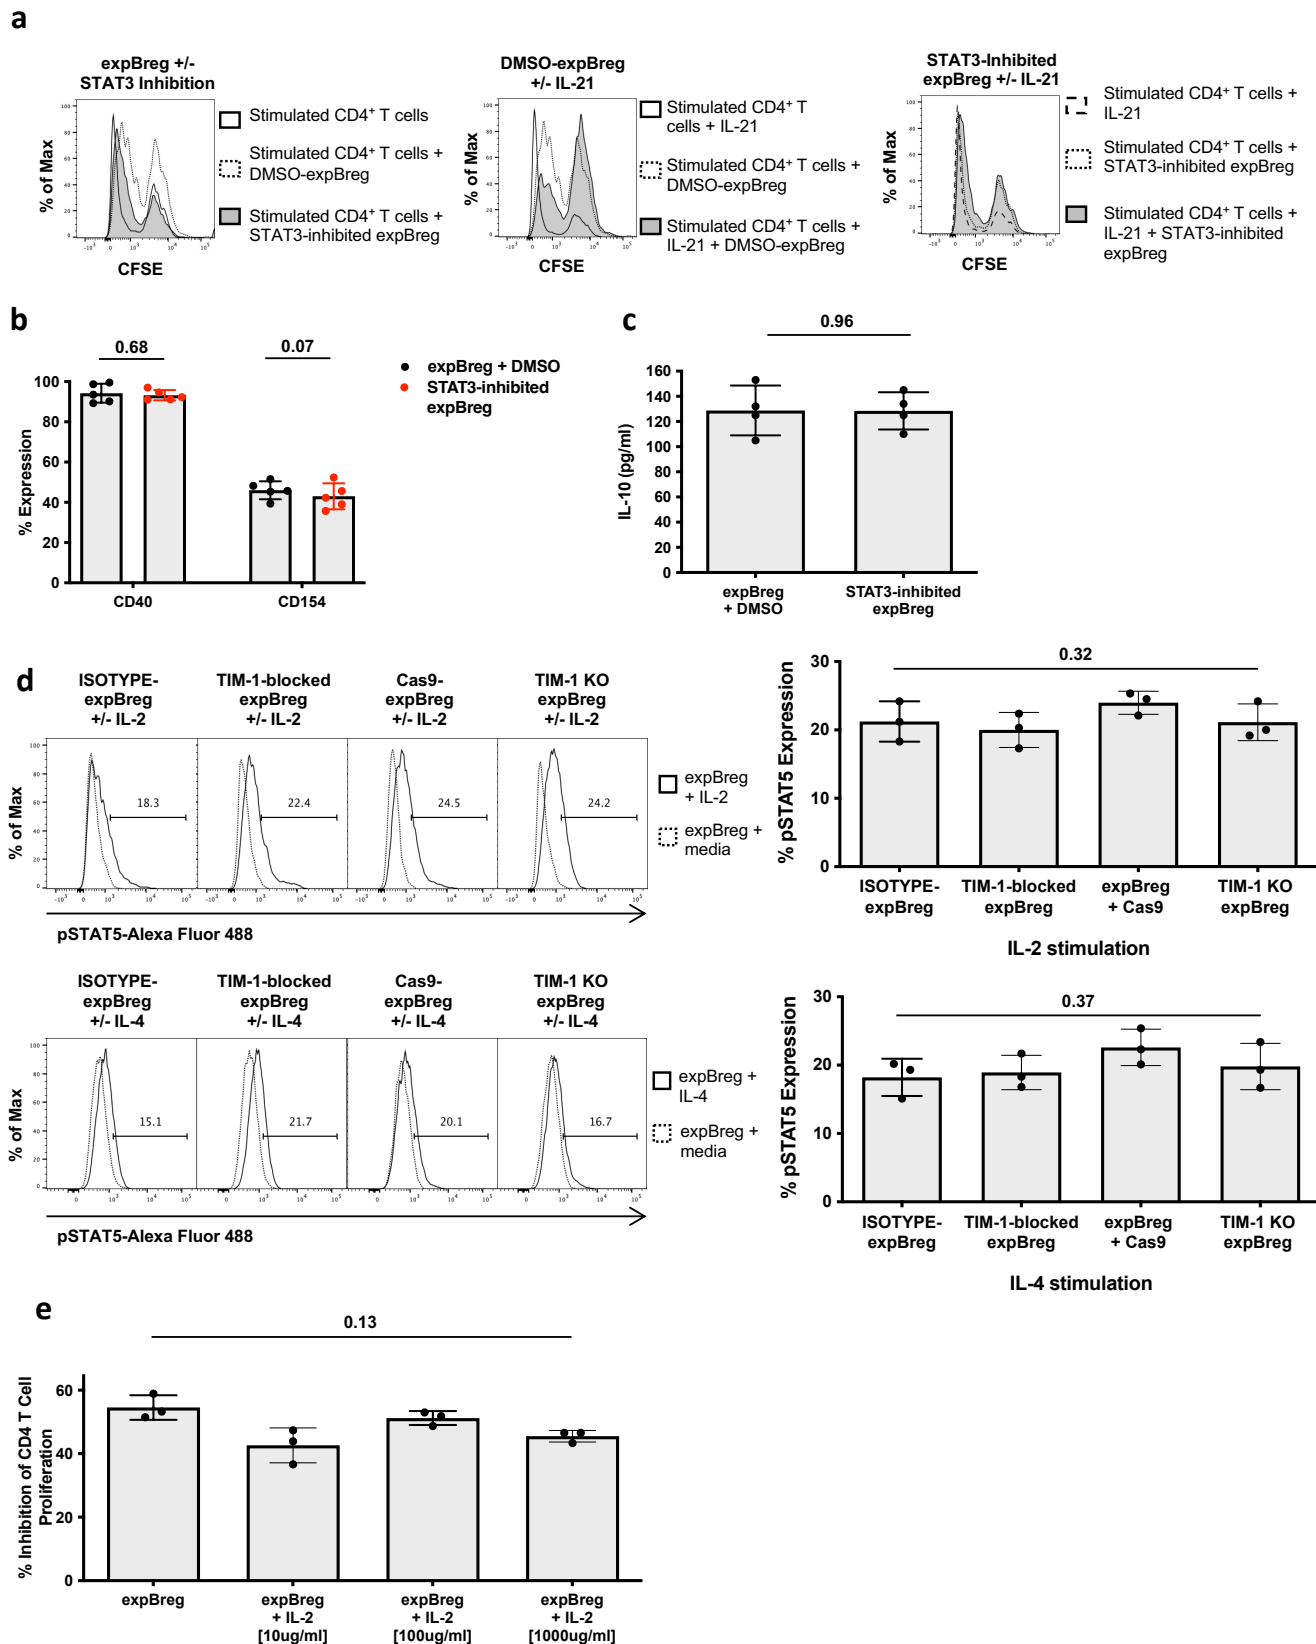

## Supplementary Figure 7

**(a)** Representative histograms of live CD4<sup>+</sup>CFSE<sup>+</sup> T cells are presented when autologous CD4<sup>+</sup>CFSE<sup>+</sup> T cells and anti-CD3/CD28 beads were co-cultured with expBreg +/- STAT3 inhibitor +/- IL-21 [0.05µg/ml]. expBreg were incubated for 2 hours with the STAT3 inhibitor WP 1066 [10µM] +/- hIL-21 [0.05µg/ml], or DMSO +/- hIL-21 [0.05µg/ml], washed and suppressive function analysed. **(b)** Summarised data are presented which demonstrate expression of CD40 and CD154 in the presence of STAT3 inhibition or DMSO. Data from experiments performed with cells from different healthy donors ( $n = 5$ ) are presented. Each dot is an individual response. **(c)** Summarised data of IL-10 production by expBreg are presented when in the presence of STAT3 inhibition or DMSO. Data from experiments performed with cells from different healthy donors ( $n = 4$ ) are presented. Each dot is an individual response. **(d)** Representative histograms of CD19<sup>+</sup> B cells and summarised data of % STAT5 phosphorylation (pSTAT5) are presented when Isotype-expBreg, TIM-blocked-expBreg, Cas9-expBreg or TIM-1 KO expBreg were incubated with media, IL-2 [ $10^4$  U/ml] or IL-4 [1µg/ml] for 10 minutes and stained for pSTAT5. Data from experiments performed with cells from different healthy donors ( $n = 3$ ) are presented. Each dot is an individual response. **(e)** Summarised data of % inhibition of CD4<sup>+</sup> T cell proliferation are presented when autologous CD4<sup>+</sup>CFSE<sup>+</sup> T cells and anti-CD3/CD28 beads were co-cultured with expBreg +/- IL-2. IL-2 was added at day-0 of the suppression assay, at different concentrations ([10ug/ml], [100ug/ml], 1000ug/ml]). Data from experiments performed with cells from different healthy donors ( $n = 3$ ) are presented. Each dot is an individual response. Error bars in **(b, c, d, e)** represent Mean +/- SD. One-way ANOVA with Tukey's multiple comparisons test **(d, e)** and 2-tailed paired t-test **(b, c)** were used. Source data are provided as a Source Data file.



# Supplementary Figure 8

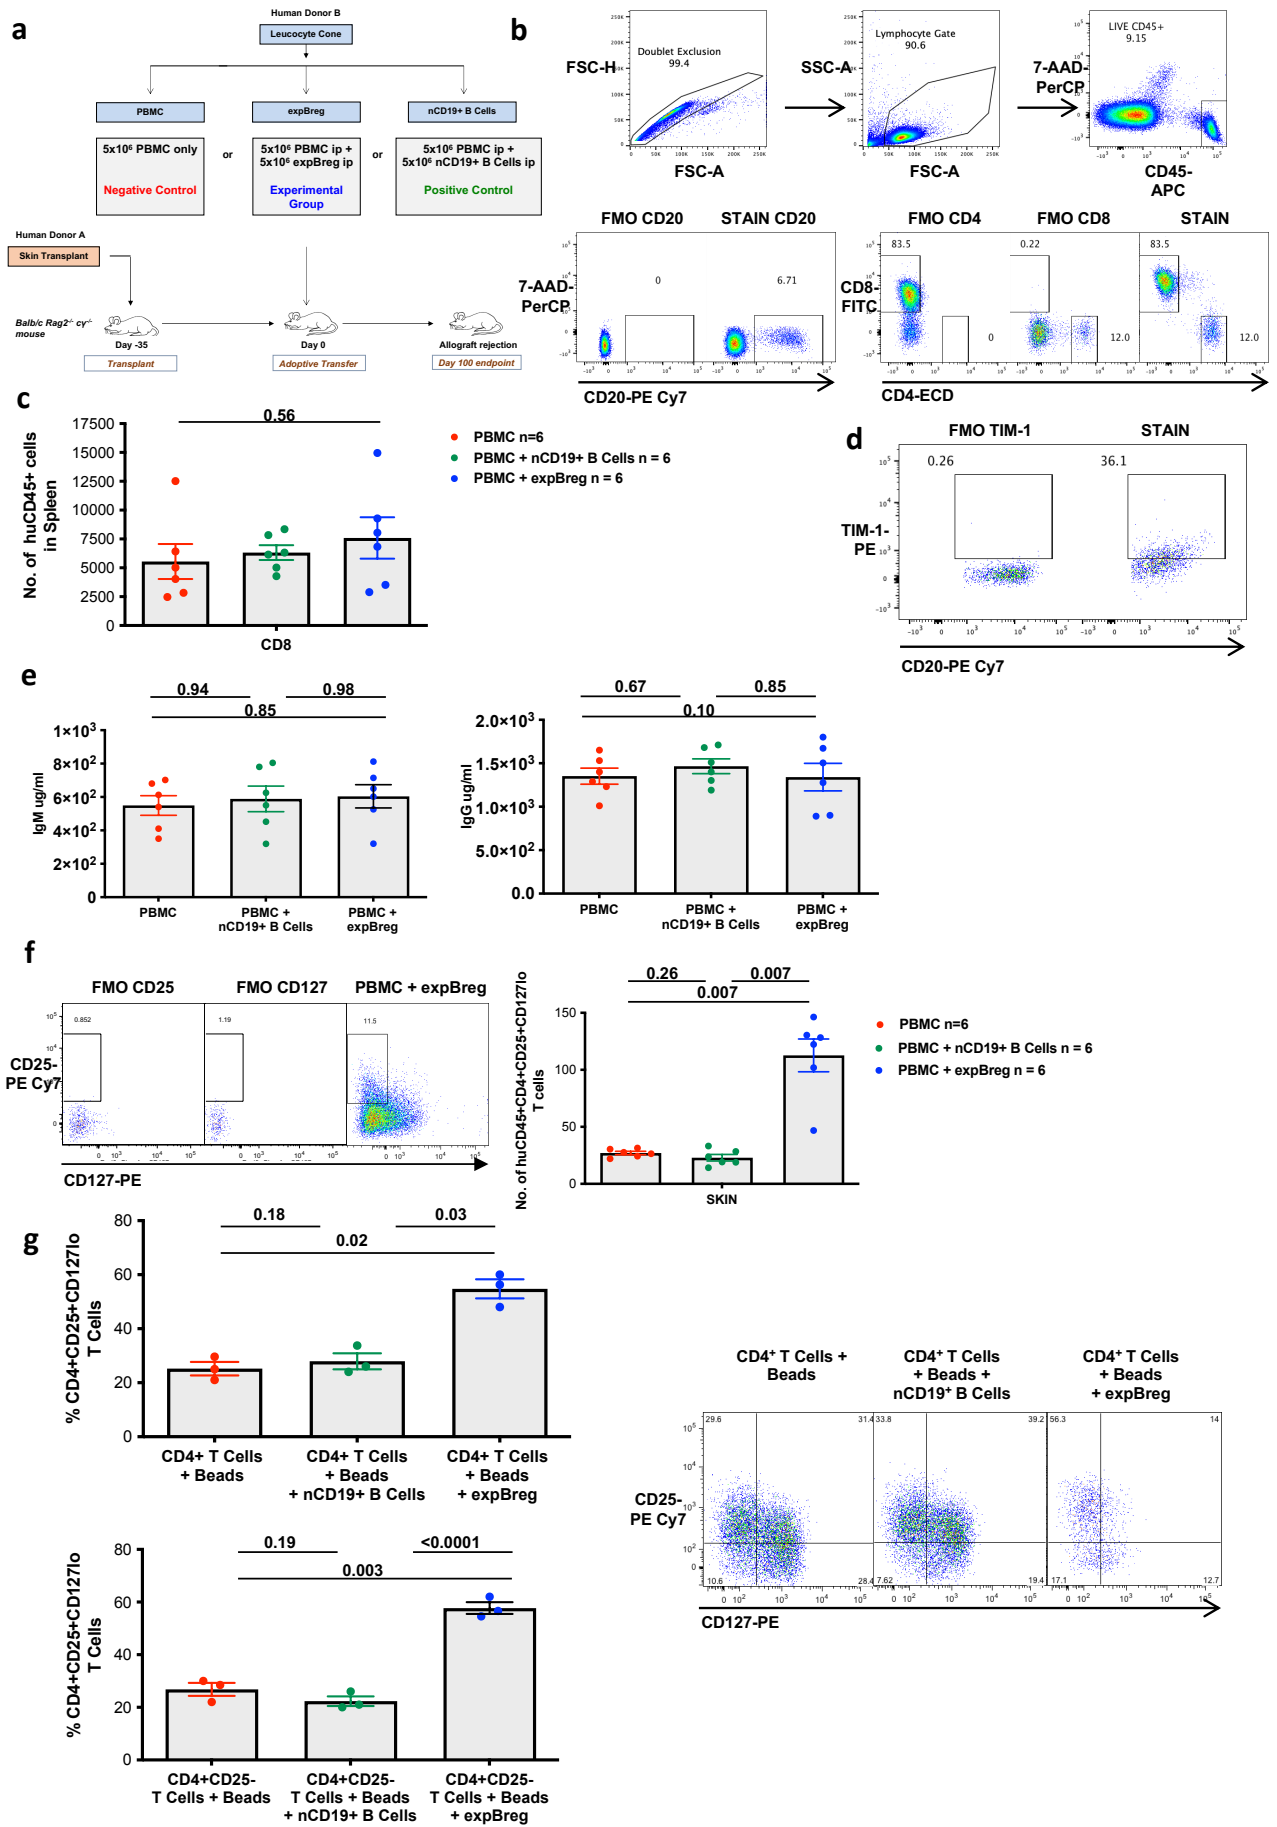

## Supplementary Figure 8

**(a)** Humanised mouse model of human skin transplantation experimental set-up. **(b)** Gating strategy and representative FACS plots of live huCD45<sup>+</sup> cells in human skin allograft are presented. Gating is on fluorescence minus one controls (FMO). **(c)** Summarised data of the number of huCD45<sup>+</sup>CD8<sup>+</sup> T cells in spleen of mice receiving PBMC +/- nCD19<sup>+</sup> B cells or expBreg are presented. n=6 per group per experiment, one of three independent experiments is shown. Each dot is an individual mouse response. Each experiment used a different HLA-mismatched human donor pair. **(d)** Representative FACS plots of live huCD45<sup>+</sup>CD20<sup>+</sup>TIM-1<sup>+</sup> B cells in human skin allograft are presented. Gating is on FMO controls. **(e)** Summarised data of serum levels of human IgM and IgG in peripheral blood of mice receiving PBMC +/- nCD19<sup>+</sup> B cells or expBreg are presented. n=6 per group per experiment, one of three independent experiments is shown. Each dot is an individual mouse response. Each experiment used a different HLA-mismatched human donor pair. **(f)** Representative FACS plots and summarised data of the number of live huCD45<sup>+</sup>CD4<sup>+</sup>CD25<sup>+</sup>CD127<sup>lo</sup> putative Treg in human skin allograft of mice receiving PBMC +/- nCD19<sup>+</sup> B cells or expBreg are presented. n=6 per group per experiment, one of three independent experiments is shown. Each dot is an individual mouse response. Each experiment used a different HLA-mismatched human donor pair. **(g)** Representative FACS plots and summarised data of live CD4<sup>+</sup> T cells demonstrating % of putative Treg when expBreg and anti CD3/CD28 beads are co-cultured with CD4<sup>+</sup> T cells or CD4<sup>+</sup>CD25<sup>-</sup> T cells *in vitro* for 5 days, when compared to controls. Data from experiments performed with cells from different healthy donors ( $n = 3$ ) are presented. Each dot is an individual response. Error bars in **(c, e, f)** represent Mean +/- SEM. Error bars in **(g)** represent Mean +/- SD. One-way ANOVA with Tukey's multiple comparisons test **(c, e, f, g)** were used. Source data are provided as a Source Data file.

# Supplementary Figure 9

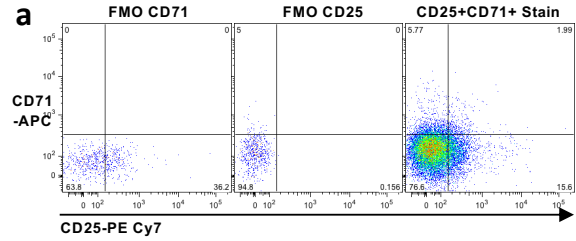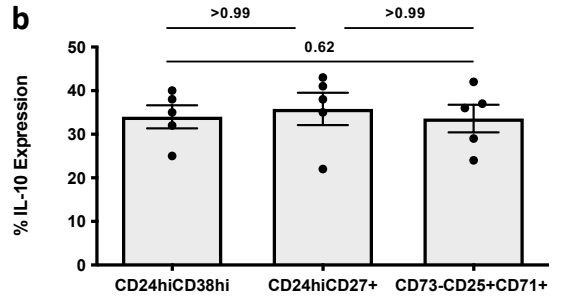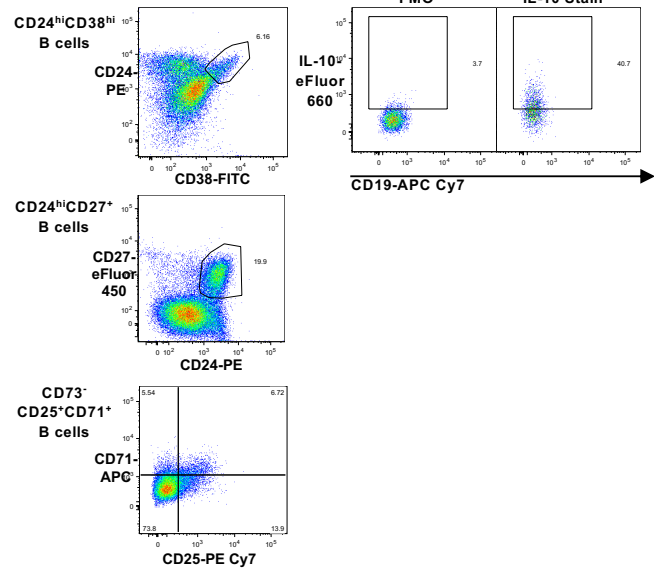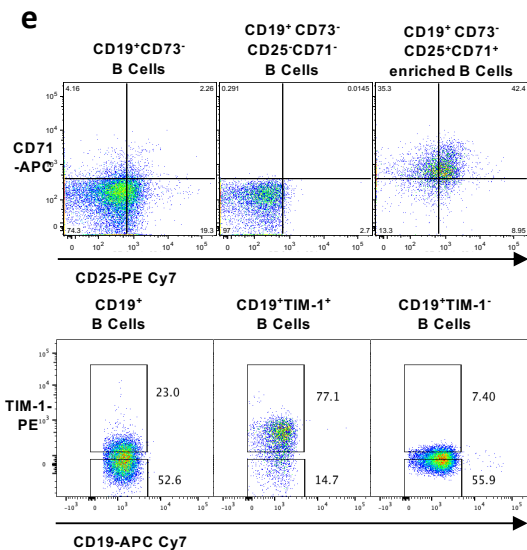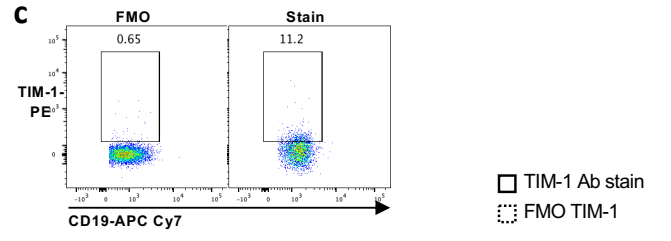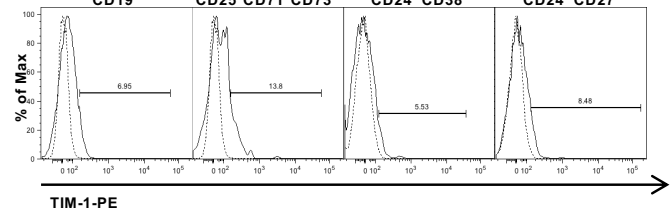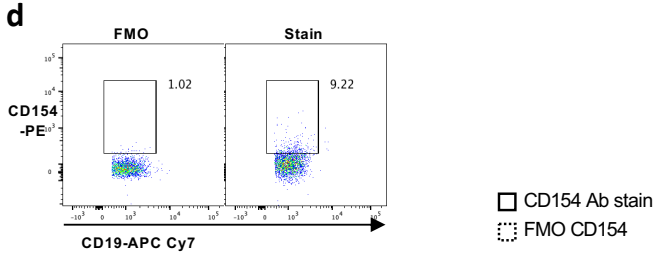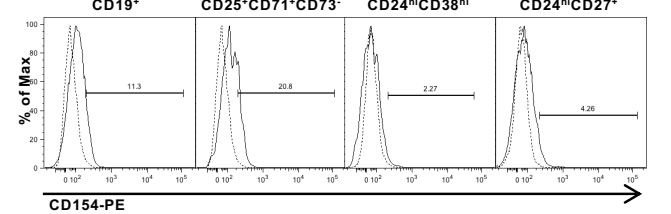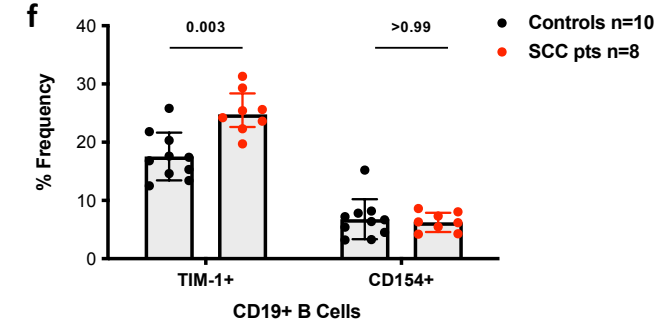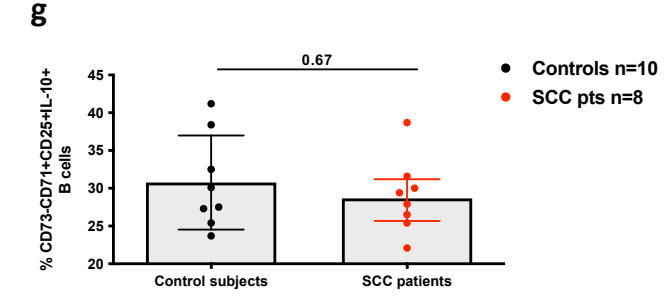

## Supplementary Figure 9

**(a)** Representative FACS plots of live CD19<sup>+</sup>CD73<sup>-</sup> B cells to demonstrate gating strategy for CD19<sup>+</sup>CD73<sup>-</sup>CD25<sup>+</sup>CD71<sup>+</sup> B Cells from human peripheral blood. Gating is on fluorescence minus one controls (FMO). **(b)** Representative FACS plots and summarised data of % IL-10 expression by CD24<sup>hi</sup>CD38<sup>hi</sup>, CD24<sup>hi</sup>CD27<sup>+</sup> and CD73<sup>-</sup>CD25<sup>+</sup>CD71<sup>+</sup> Breg subsets from human peripheral blood. Gating is on FMO controls. Data from experiments performed with cells from different healthy donors ( $n = 5$ ) are presented. Each dot is an individual response. **(c)** Representative FACS plots of % TIM-1<sup>+</sup> B cells in whole CD19<sup>+</sup> B cells, CD73<sup>-</sup>CD25<sup>+</sup>CD71<sup>+</sup>, CD24<sup>hi</sup>CD38<sup>hi</sup> and CD24<sup>hi</sup>CD27<sup>+</sup> B cell subsets in peripheral blood of healthy human donors. Gating is on FMO controls. **(d)** Representative FACS plots of % CD154<sup>+</sup> B cells in whole CD19<sup>+</sup> B cells, CD73<sup>-</sup>CD25<sup>+</sup>CD71<sup>+</sup>, CD24<sup>hi</sup>CD38<sup>hi</sup> and CD24<sup>hi</sup>CD27<sup>+</sup> B cell subsets in peripheral blood of healthy human donors. Gating is on FMO controls. **(e)** Representative FACS plots of FACS-sorted CD73<sup>-</sup>CD25<sup>-</sup>CD71<sup>-</sup>, CD73<sup>-</sup>CD25<sup>+</sup>CD71<sup>+</sup> enriched, TIM-1<sup>+</sup> and TIM-1<sup>-</sup> B cells from human peripheral blood. **(f)** Summarised data of % TIM-1<sup>+</sup> and CD154<sup>+</sup> B cells within CD19<sup>+</sup> B cells in peripheral blood of healthy human donors ( $n=10$ ) and age-matched patients with SCC ( $n=8$ ). Each dot is an individual response. **(g)** Summarised data of % IL-10 expression within CD73<sup>-</sup>CD25<sup>+</sup>CD71<sup>+</sup> B cells in peripheral blood of healthy human donors ( $n=10$ ) and age-matched patients with SCC ( $n=8$ ). Each dot is an individual response. Error bars in **(b, f, g)** represent Median + interquartile range. One way ANOVA with Dunn's multiple comparisons test **(b)** and 2-tailed Mann Whitney test **(f, g)** were used. Source data are provided as a Source Data file.

# Supplementary Figure 10

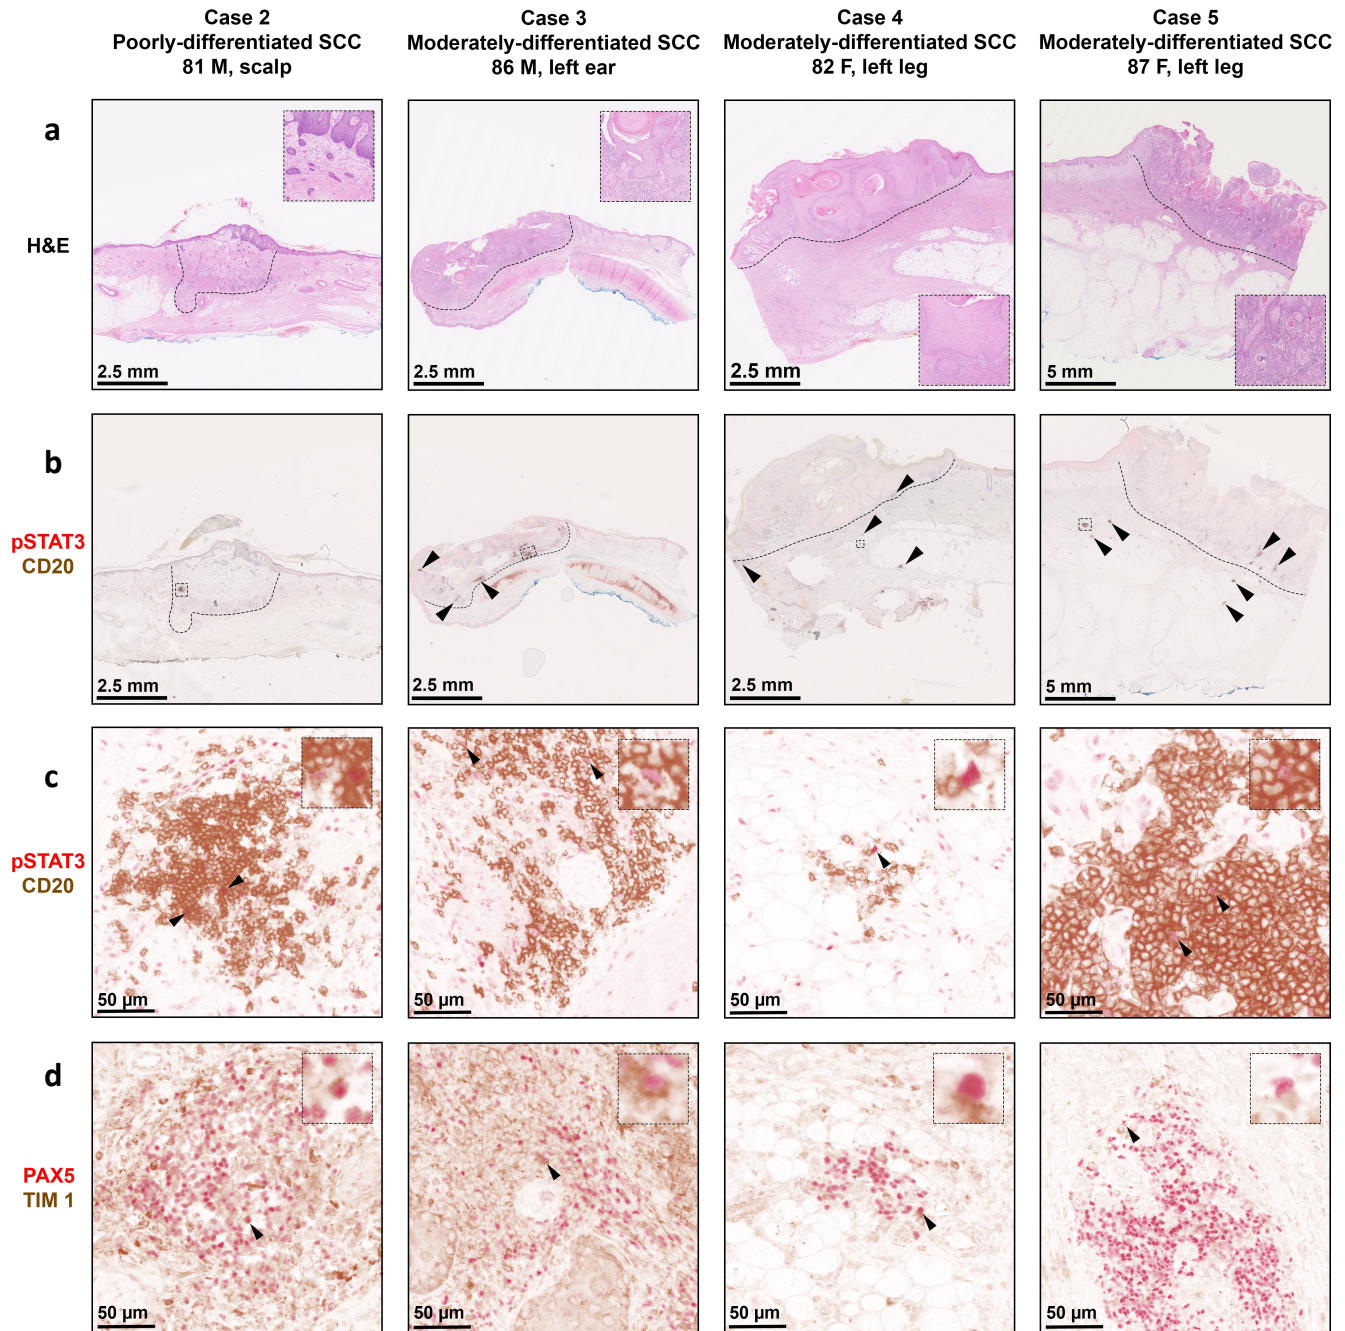

## Supplementary Figure 10

**(a)** Hematoxylin and eosin (H&E) stained histological sections demonstrating invasive squamous cell carcinomas in an additional four patients (hashed line delineates tumour boundary; higher magnification image demonstrating representative histological features in top or bottom right-hand corners). **(b)** Double immunohistochemistry staining for pSTAT3 (red) and CD20 (brown) demonstrates the peritumoral accumulation of CD20<sup>+</sup> B cells (arrows), predominantly arranged as clusters, both within the tumours themselves and in proximity to their invasive margins (hashed line). **(c)** Higher magnification images of the annotated B cell clusters shown in (b) (hashed boxes), demonstrating double positive cells (arrows). **(d)** On the adjacent section, a single cell double stained for PAX5 (a master regulator of B cell development; red) and TIM 1 (brown) is identified in each cluster (arrows; higher magnification images of these cells in top right-hand corners). Each case in **(a, b, c, d)** represents 1 patient (n=4 patients).



Supplementary Table 1

| Antibody (Human) | Fluorochrome    | Concentration   | Supplier        | Catalogue Number |
|------------------|-----------------|-----------------|-----------------|------------------|
| CD19             | APC-Cy7         | 1:100           | BD Pharmingen   | 557791           |
| CD25             | PE-Cy7          | 1:100           | BD Pharmingen   | 557741           |
| CD24             | PE              | 1:100           | BD Pharmingen   | 555428           |
| CD38             | FITC            | 1:100           | BD Pharmingen   | 555459           |
| CD127            | PE              | 1:100           | BD Pharmingen   | 557938           |
| IgD              | PE-Cy7          | 1:100           | BD Pharmingen   | 561314           |
| pSTAT3           | Alexa Fluor 647 | 1:6             | BD Pharmingen   | 557815           |
| pSTAT5           | Alexa Fluor 488 | 1:6             | BD Pharmingen   | 562077           |
| CD20             | PE-Cy7          | 1:100           | eBioscience     | 25-0209-42       |
| CD4              | PE-Texas Red    | 1:100           | eBioscience     | 61-0049-42       |
| CD8              | FITC            | 1:100           | eBioscience     | 11-0088-42       |
| $\gamma$ CR      | PE              | 1:100           | eBioscience     | 12-1329-41       |
| CD27             | eFluor 450      | 1:100           | eBioscience     | 48-0279-42       |
| CD138            | eFluor 450      | 1:100           | eBioscience     | 17-1389-41       |
| CD1d             | APC             | 1:100           | eBioscience     | 17-0016-42       |
| CD5              | FITC            | 1:100           | eBioscience     | 11-0058-42       |
| CD21             | eFluor 450      | 1:100           | eBioscience     | 9048-0219-025    |
| CD71             | APC             | 1:100           | eBioscience     | 17-0719-41       |
| CD73             | eFluor 450      | 1:100           | eBioscience     | 48-0739-41       |
| LAP              | PE              | 1:100           | eBioscience     | 12-9829-41       |
| IL-10            | eFluor 660      | 1:4             | eBioscience     | 50-7108-41       |
| TNF $\alpha$     | FITC            | 1:4             | eBioscience     | 11-7349-41       |
| IFN $\gamma$     | PE              | 1:4             | eBioscience     | 12-7319-41       |
| CD154            | PE              | 1:100           | eBioscience     | 12-1548-42       |
| IgM              | PE              | 1:100           | eBioscience     | 12-9998-42       |
| CD40             | APC             | 1:100           | eBioscience     | 17-0409-41       |
| CD80             | FITC            | 1:100           | eBioscience     | 11-0809-42       |
| CD86             | PE              | 1:100           | eBioscience     | 12-0869-42       |
| FAS-L            | PE              | 1:100           | eBioscience     | 12-9919-41       |
| PD-L1            | PE-Cy7          | 1:100           | eBioscience     | 25-5983-41       |
| PD-L2            | APC             | 1:100           | eBioscience     | 17-5888-41       |
| TIM-1            | PE              | 1:100           | Biologend       | 353903           |
| IL-10R           | APC             | 1:100           | Biologend       | 308811           |
| CD122            | APC             | 1:100           | Biologend       | 339007           |
| IL-6R $\alpha$   | PE              | 1:100           | Biologend       | 352803           |
| CD154            | FITC            | 1:100           | Biologend       | 310804           |
| CD10             | PE-Texas Red    | 1:100           | Beckman Coulter | 41116015         |
| CD45             | APC             | 1:100           | Invitrogen      | MHCD45054        |
| CD154            | APC             | 1:100           | R&D Systems     | FAB617A          |
| CD25             | PE              | 1:100           | R&D Systems     | FAB1020P-025     |
| CD154            | Unconjugated    | [10 $\mu$ g/ml] | R&D Systems     | MAB617           |
| CD40             | Unconjugated    | [10 $\mu$ g/ml] | R&D Systems     | MAB6322          |
| IL-10            | Unconjugated    | [10 $\mu$ g/ml] | R&D Systems     | MAB217           |
| IL-10R $\alpha$  | Unconjugated    | [10 $\mu$ g/ml] | R&D Systems     | MAB274           |
| CD122            | Unconjugated    | [10 $\mu$ g/ml] | R&D Systems     | MAB224           |
| CD25             | Unconjugated    | [10 $\mu$ g/ml] | R&D Systems     | MAB223           |

| <b>Antibody (Human)</b>  | <b>Fluorochrome</b> | <b>Concentration</b> | <b>Supplier</b>  | <b>Catalogue Number</b> |
|--------------------------|---------------------|----------------------|------------------|-------------------------|
| <b>CD80</b>              | Unconjugated        | [10µg/ml]            | R&D Systems      | MAB140                  |
| <b>CD86</b>              | Unconjugated        | [10µg/ml]            | R&D Systems      | MAB141                  |
| <b>FASL</b>              | Unconjugated        | [10µg/ml]            | R&D Systems      | MAB126                  |
| <b>PD-1</b>              | Unconjugated        | [10µg/ml]            | R&D Systems      | AF1086                  |
| <b>IL-6</b>              | Unconjugated        | [10µg/ml]            | R&D Systems      | MAB2061                 |
| <b>IL-6R</b>             | Unconjugated        | [10µg/ml]            | R&D Systems      | MAB227R                 |
| <b>IgG<sub>1κ</sub></b>  | Unconjugated        | [10µg/ml]            | R&D Systems      | MAB002                  |
| <b>IgG<sub>2ακ</sub></b> | Unconjugated        | [10µg/ml]            | R&D Systems      | MAB004                  |
| <b>CD25</b>              | Unconjugated        | [10µg/ml]            | R&D Systems      | MAB1020                 |
| <b>TIM-1</b>             | Unconjugated        | [10µg/ml]            | Biologend        | 353902                  |
| <b>CD20</b>              | Unconjugated        | 1:100                | Leica Biosystems | PA0200                  |
| <b>pSTAT3</b>            | Unconjugated        | 1:100                | Abcam            | ab76315                 |
| <b>TIM-1</b>             | Unconjugated        | 1:100                | Abcam            | ab47635                 |
| <b>PAX5</b>              | Unconjugated        | 1:500                | Abcam            | ab109443                |
